# Supplementary material for: Free-standing flexible film as a binder-free electrode for an efficient hybrid deionization system
Source: Royal Society of Chemistry journal article supplement (doi:10.1039/c8nr09119f), 2019-01-01
Supplement: c8nr09119f1.pdf [file c8nr09119f1.pdf]

# Electronic Supplementary Information

## Free-standing flexible film as a binder-free electrode for efficient hybrid deionization system†

Deepa Sriramulu<sup>a</sup> and Hui Ying Yang<sup>a\*</sup>

<sup>a</sup>Pillar of Engineering Product Development,

Singapore University of Technology and Design, Singapore 487372

[yanghuiying@sutd.edu.sg](mailto:yanghuiying@sutd.edu.sg)

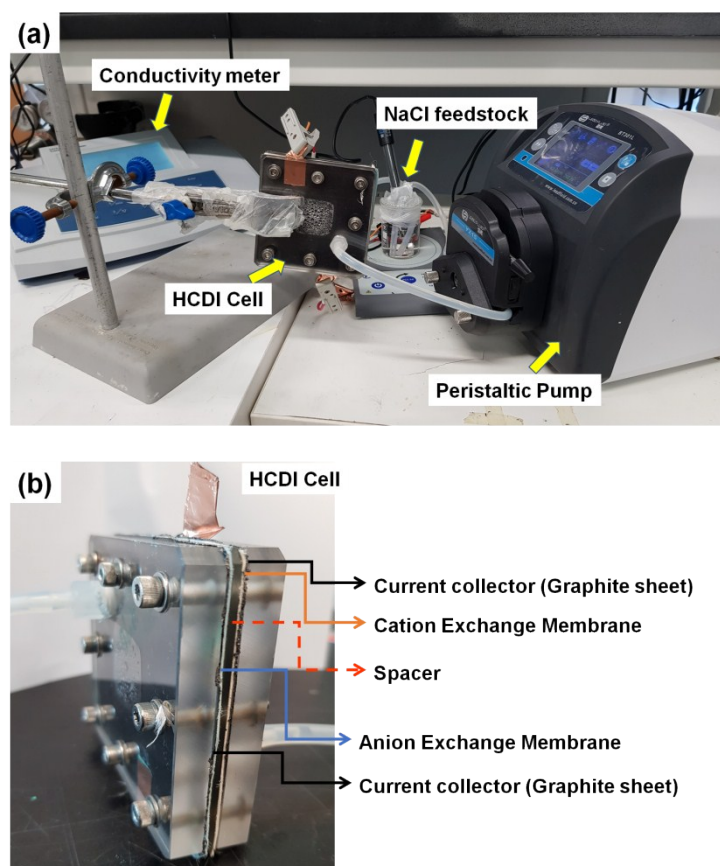

**Fig. S1** Photographical image of hybrid capacitive deionization (HCDI) experimental set up (a) and the HCDI cell unit (b).

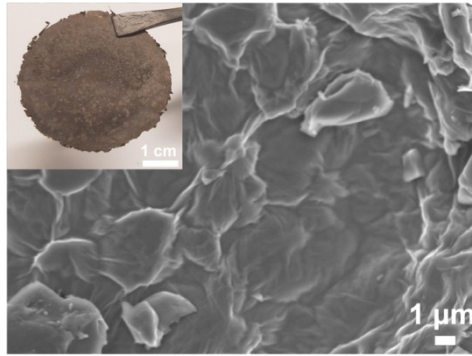

**Fig. S2** SEM image of AC@rGO film.

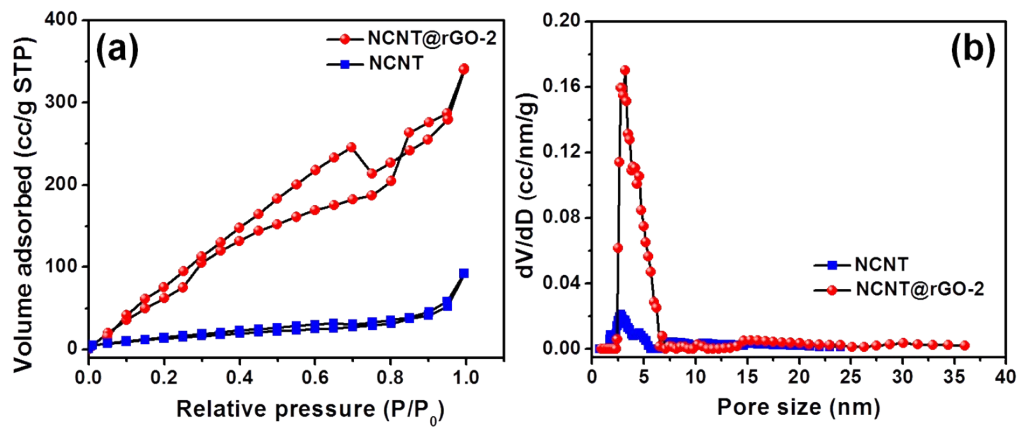

**Fig .S3** a) Nitrogen adsorption-desorption isotherms, (b) pore size distribution of NCNT composite and NCNT@rGO-2 film.

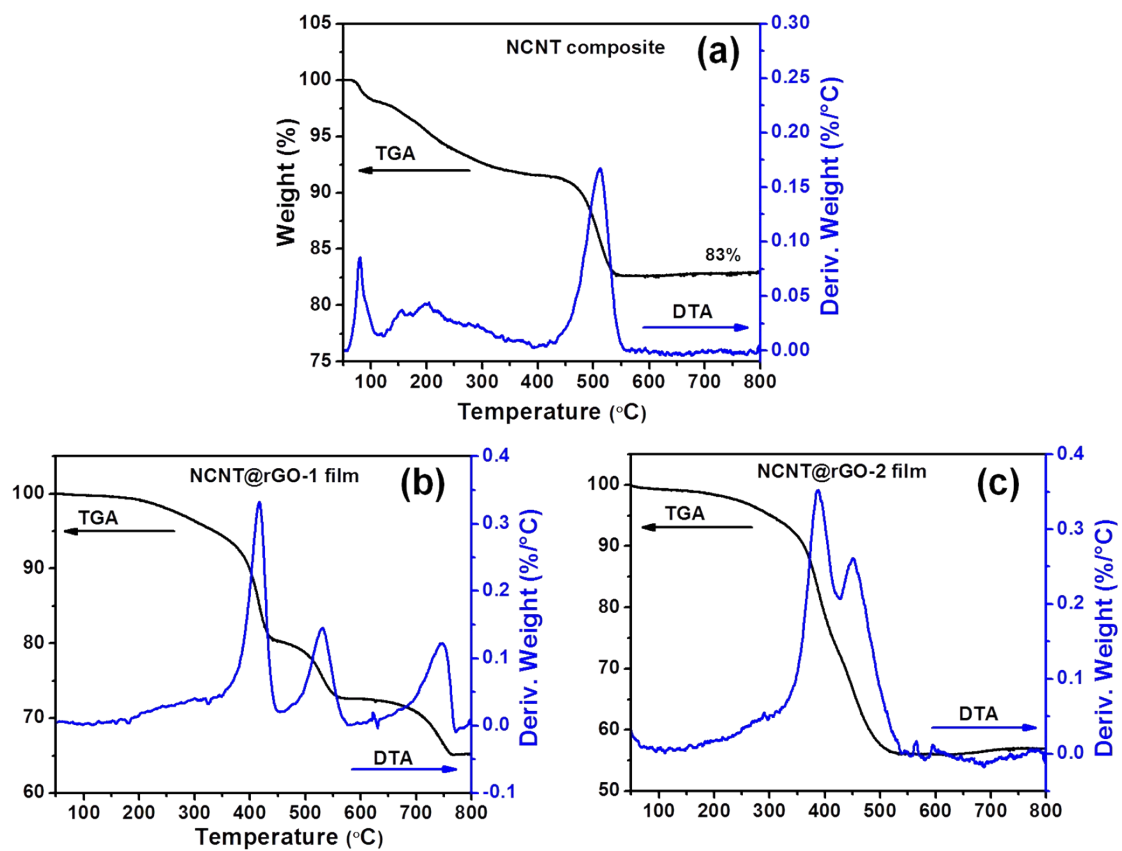

**Fig. S4** DTA curves for (a) NCNT composite; (b) NCNT@rGO-1 film; (c) NCNT@rGO-2 film.

**Table S1** FTIR analysis results and comparisons of GO, NCNT composite and NCNT@rGO film

| Electrode material | Band                                                                                                                            | Characteristic peak                                                                                                                                                                                                                        |
|--------------------|---------------------------------------------------------------------------------------------------------------------------------|--------------------------------------------------------------------------------------------------------------------------------------------------------------------------------------------------------------------------------------------|
| 1) GO              | ~3000 - 3400 cm <sup>-1</sup><br>2922, 2850, 1717, 1633, 1398 and 1099 cm <sup>-1</sup>                                         | stretching vibrations of surface hydroxyl groups of -COOH and H <sub>2</sub> O<br>asymmetric C-H, symmetric C-H, carbonyl (C=O), aromatic (C=C), carboxyl (O=C-O) and alkoxy (C-O) stretching vibrations                                   |
| 2) NCNT composite  | 477 and 718 cm <sup>-1</sup><br>907 cm <sup>-1</sup><br>1637 and 3214 cm <sup>-1</sup><br>3400 cm <sup>-1</sup>                 | Ti-O vibrations<br>stretching peak of Ti-O-Na<br>stretching and bending modes of hydroxyl (-OH) and water molecules coordinated to Ti <sup>4+</sup> ions<br>stretching vibration of hydroxyl groups from O=C-OH and C-OH present in MWCNTs |
| 3) NCNT@rGO film   | 477 and 718 cm <sup>-1</sup><br>907 cm <sup>-1</sup><br>3400 cm <sup>-1</sup><br>1570 cm <sup>-1</sup><br>1160 cm <sup>-1</sup> | Ti-O vibration<br>stretching peak of Ti-O-Na<br>stretching vibration of hydroxyl groups from O=C-OH and C-OH present in MWCNT<br>C=C stretching of rGO<br>C-OH stretching of rGO                                                           |

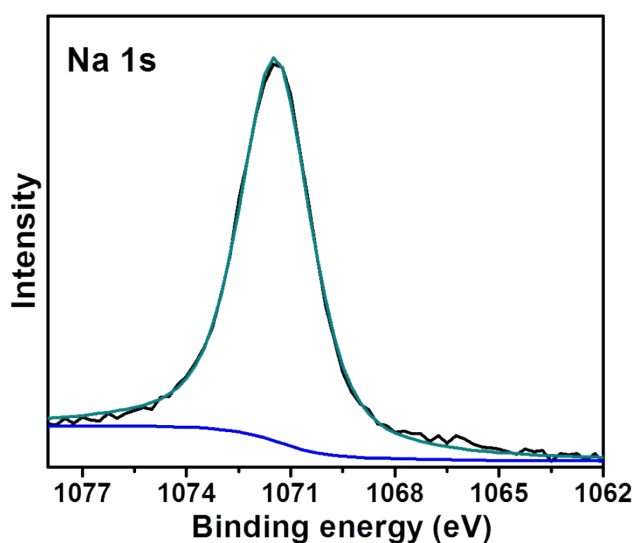

**Fig. S5** High resolution spectrum of Na 1s corresponding to NCNT@rGO film.

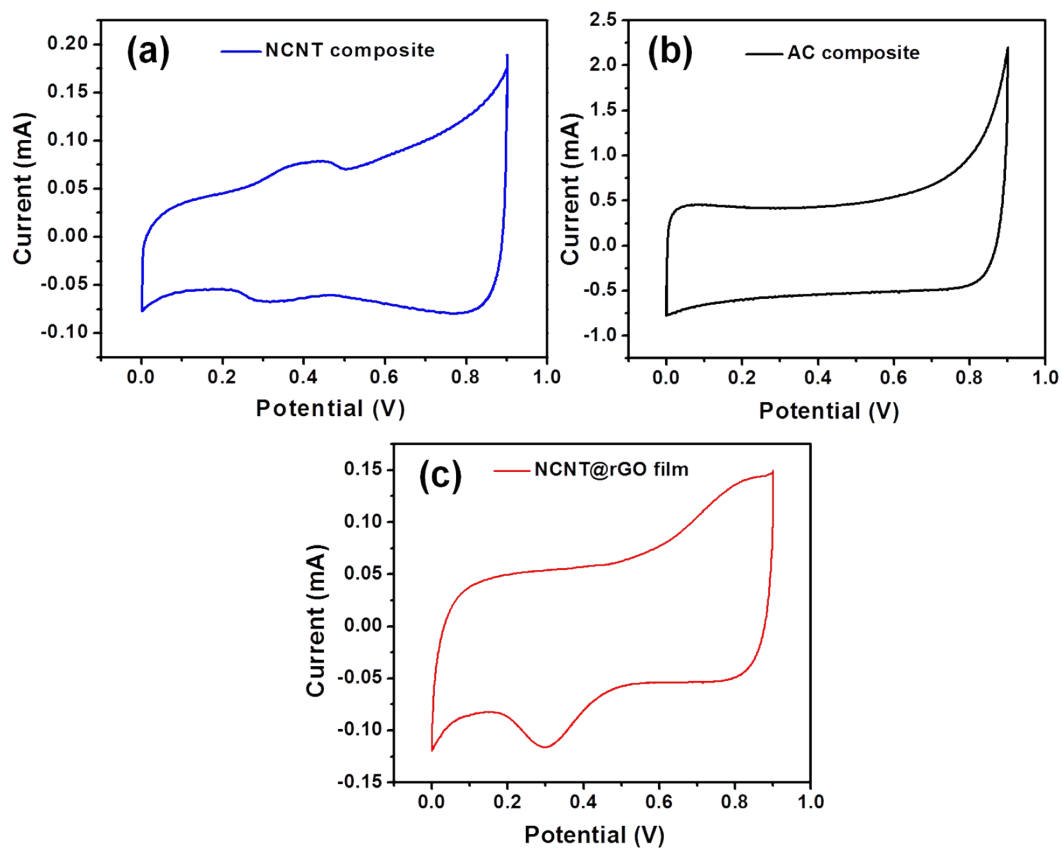

**Fig. S6** Cyclic voltammograms curves in a voltage range of 0.0-0.9 V for (a) NCNT composite; (b) Activated carbon composite; and (c) NCNT@rGO film electrode at a scan rate of 1 mV/s in 3M NaCl solution.

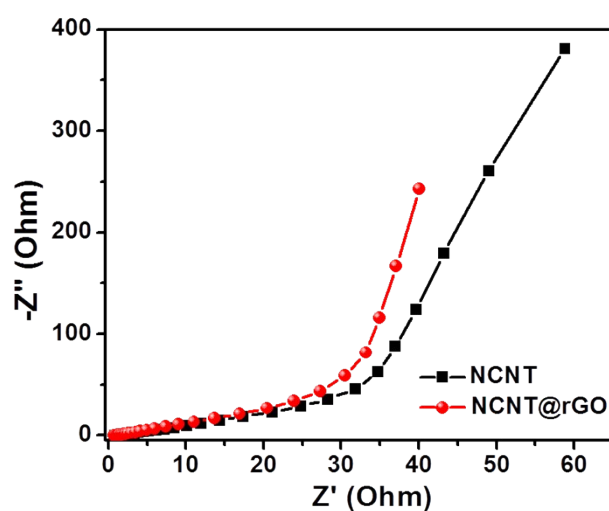

**Fig. S7** Electrochemical impedance spectra of the as prepared electrodes NCNT composite and NCNT@rGO in 3M NaCl solution.

**Table S2** Summary of the desalination performance, charge efficiency of electrodes in the HCDI system operated under an applied current of 1 mA

| HCDI system          | Total mass of electrode (mg)                                | ( $C_e - C_o$ )* mg/L | Salt removal capacity* (mg/g) | Time consumed for desalination at applied current of 1 mA (min)* | Desalination rate performance* (mg/g/s) | Current density (mA/g) | Charge efficiency, $\Lambda$ (%) |
|----------------------|-------------------------------------------------------------|-----------------------|-------------------------------|------------------------------------------------------------------|-----------------------------------------|------------------------|----------------------------------|
| NCNT//AC composite   | 17.3<br>(includes mass of active materials and the binders) | ~38.3                 | ~109                          | ~68                                                              | ~0.026                                  | 116                    | ~77                              |
| NCNT@rGO-1//AC@rGO-1 | 14.9                                                        | ~30.66                | ~103                          | ~45                                                              | ~0.038                                  | 147                    | ~93.6                            |
| NCNT@rGO-2//AC@rGO-2 | 14.7                                                        | ~38.16                | ~129                          | ~55                                                              | ~0.039                                  | 145                    | ~95.3                            |

\*where  $C_o$  (mg/L) is the initial NaCl concentration,  $C_e$  (mg/L) is the final equilibrated NaCl concentration. An average of 6 cycles are used for calculation.

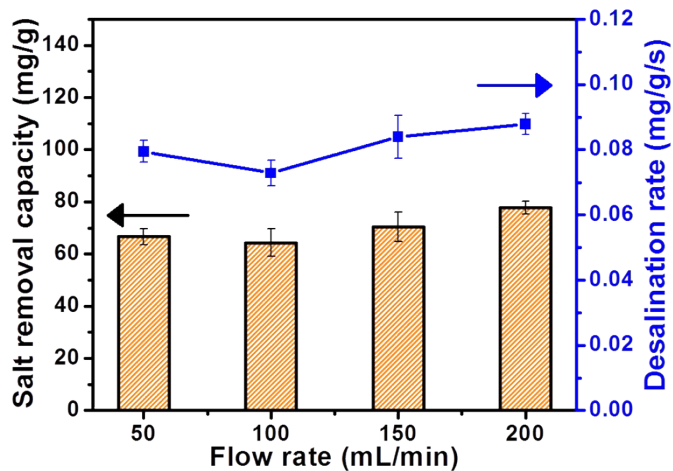

**Fig. S8** Salt removal capacity and desalination rate of NCNT@rGO-1 electrode at different flow rates in ~3000 mg/L NaCl solution at an applied current of 2mA.

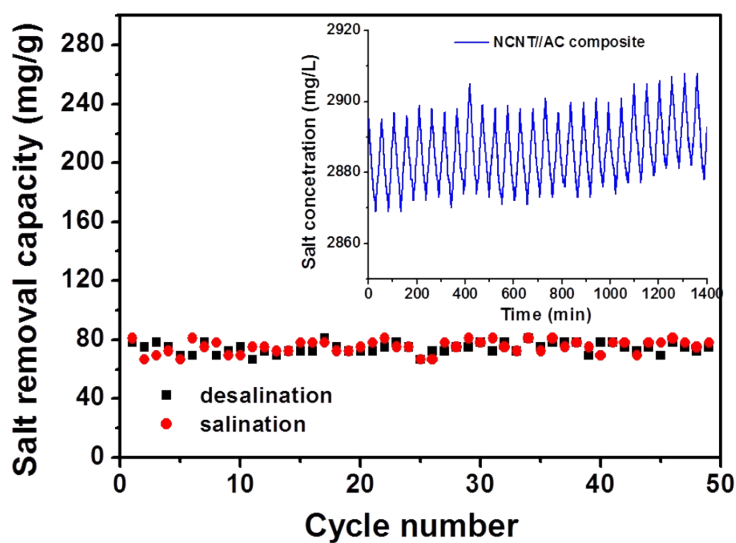

**Fig. S9 (a)** The cycling performance of the NCNT//AC system at an applied current of 1.5 mA; inset is the corresponding change in the conductivity pattern.
